# Supplementary material for: Twist1 signaling in age-dependent decline in angiogenesis and lung regeneration
Source: PubMed Central journal article supplement (PMC8034921; doi:10.18632/aging.202875), 2021-03-25
Supplement: aging-13-202875-s001.pdf [file aging-13-202875-s001.pdf]

SUPPLEMENTARY FIGURES

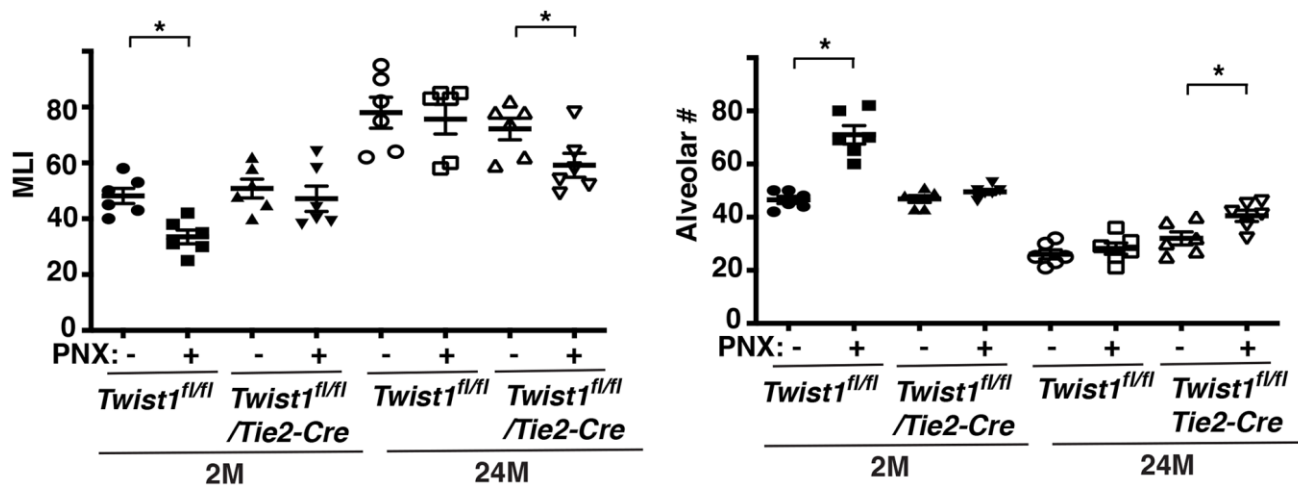

**Supplementary Figure 1. Endothelial Twist1 mediates age-dependent inhibition of post-PNX compensatory lung growth.** Graphs showing quantification of alveolar size (MLI, left) and alveolar number (right) in the cardiac lobe of 2M vs. 24M old *Twist1<sup>fl/fl</sup>* or *Twist1<sup>fl/fl</sup> / Tie2-cre* mice after PNx (n=6, mean ± s.e.m., \*, p<0.05).

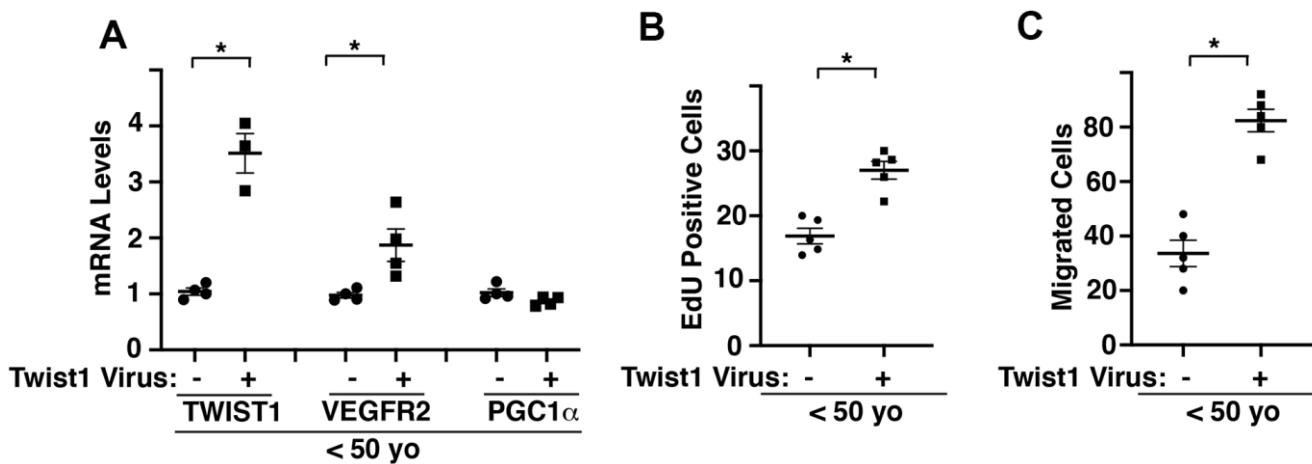

**Supplementary Figure 2. Effects of Twist1 on PGC1α and VEGFR2 expression and EC behaviors in young ECs.** (A) Graph showing the mRNA levels of TWIST1, PGC1α and VEGFR2 in ECs isolated from young (<50 years old) human adipose tissues treated with Twist1 virus or control virus (vector alone) (n=3-4, mean ± s.e.m., \*, p<0.05). (B) Graph showing EdU-positive young (<50 years old) human adipose ECs treated with lentivirus encoding Twist1 (n=5, mean ± s.e.m., \*, p<0.05). As a control, human young adipose ECs were treated with lentivirus encoding control virus (vector alone). (C) Graph showing young human adipose ECs treated with lentivirus encoding Twist1 migrating towards 5% FBS (n=5, mean ± s.e.m., \*, p<0.05).
